# Supplementary material for: Yersinia pestis genomes reveal plague in Britain 4000 years ago
Source: PubMed Central journal article supplement (PMC10229654; doi:10.1038/s41467-023-38393-w), 2023-05-30
Supplement: 41467_2023_38393_MOESM1_ESM.pdf [file 41467_2023_38393_MOESM1_ESM.pdf]

# Supplementary Material

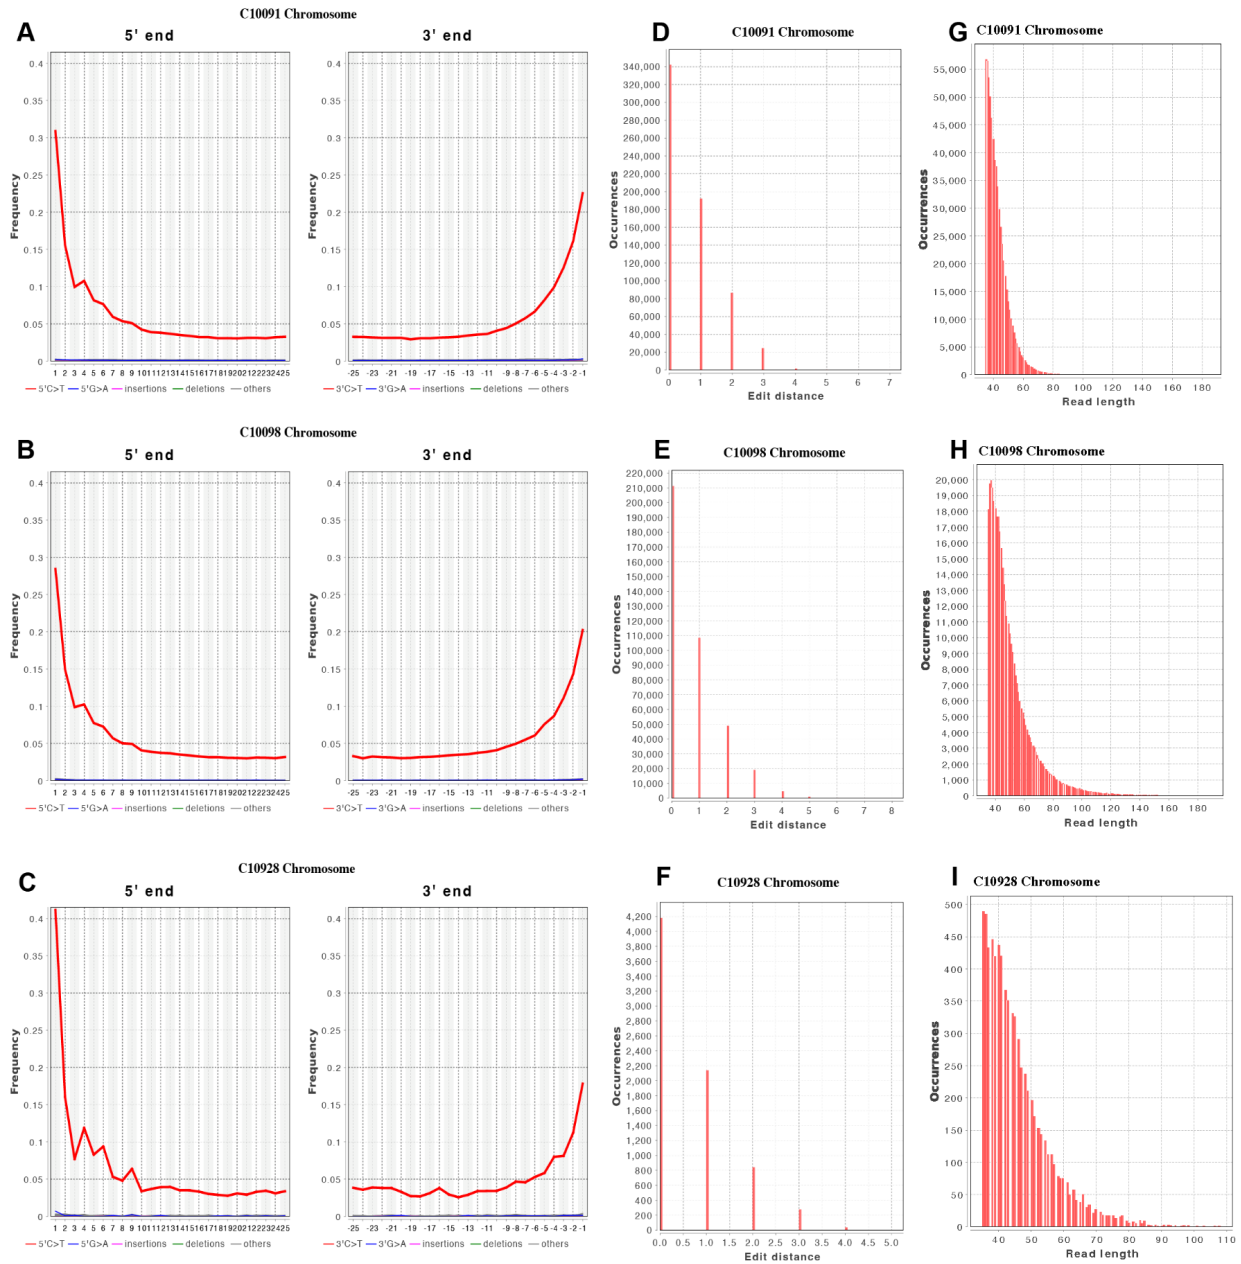

**Supplementary Figure 1. Authentication metrics for *Yersinia pestis* genomes from Charterhouse Warren (C10091 and C10098) and Levens Park (C10928) chromosomes when aligned to CO92 reference genome<sup>1</sup>.**

**A-C)** Nucleotide misincorporations resulting from cytosine deamination. **D-F)** Number of sequences with an edit distance of 1 to 4 from the *Yersinia pestis* reference genome. **G-I)** Fragment length distribution. All *Yersinia pestis* genomes in this study were authenticated using *DamageProfiler*<sup>2</sup>.

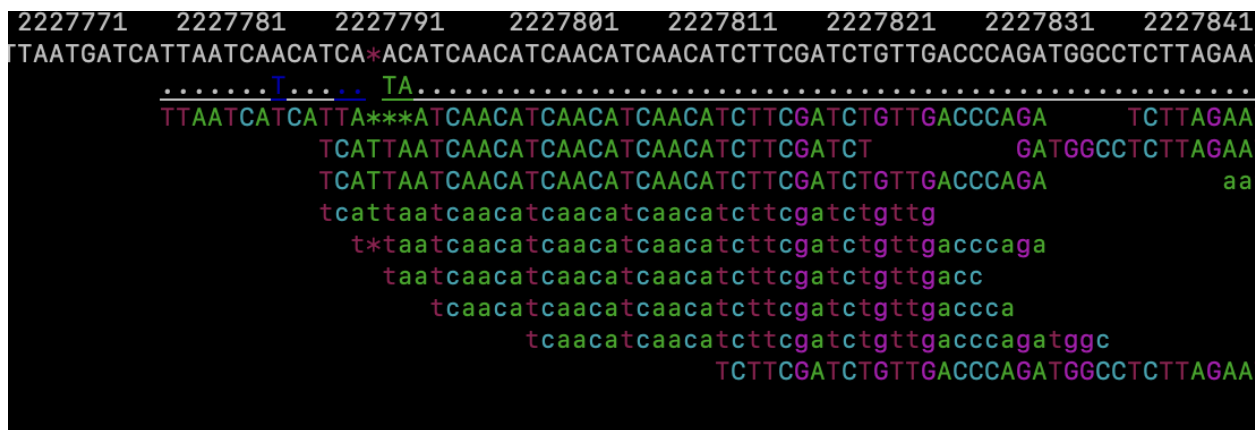

**Supplementary Figure 2. Visual alignment of C10091 sequence alignment.** SAMtools v1.3.1 tvview<sup>3</sup> alignment view of C10091 showing positions 2227793 and 2227794 when aligned to the CO92<sup>1</sup> (NC\_003143.1) reference sequence.

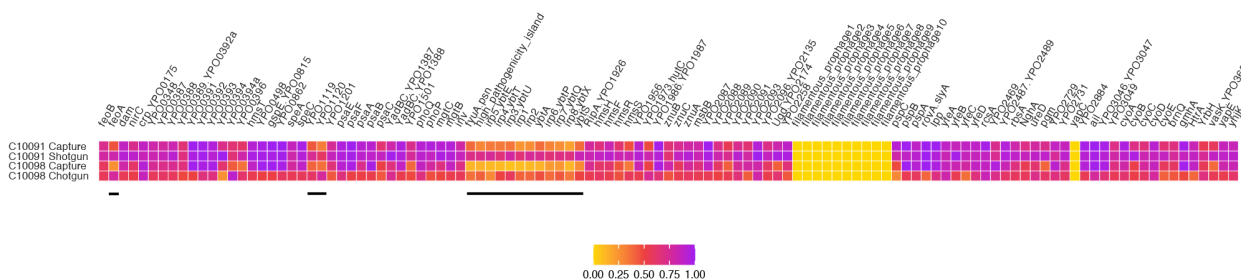

**Supplementary Figure 3. Comparison of the coverage of virulence genes on the *Yersinia pestis* chromosome for captured (targeted enrichment) and shotgun-sequenced libraries.** Heatmap of inferred presence/absence of virulence-associated genes assessed by normalised depth-of-coverage across the *Yersinia pestis* chromosome separated by whether libraries were captured or shotgun sequenced. In the captured libraries, some regions (underlined in black) have lower coverage in captured libraries than in the shotgun libraries. Given this capture-specific pattern, there is no evidence of novel deletions in the Levens Park genome, which is primarily reconstructed with capture (**Figure 2B**). Libraries were captured using myBaits Arbor Biosciences, following myBaits custom RNA seq v5.1 (March 2021) High Sensitivity protocol.

**Supplementary Table 1.** Published ancient *Yersinia pestis* genomes used in this study.

| <i>Yersinia pestis</i> genome               | Lineage                                     | Publication                                                           |
|---------------------------------------------|---------------------------------------------|-----------------------------------------------------------------------|
| Gokhem2                                     | Neolithic                                   | Rascovan et al. 2019 <sup>4</sup> / Skoglund et al. 2014 <sup>5</sup> |
| RV2039                                      | Neolithic                                   | Susat et al. 2021 <sup>6</sup>                                        |
| I2470                                       | LNBA <i>ymt+</i>                            | Andrades Valtueña et al. 2022 <sup>7</sup>                            |
| RT5                                         | LNBA <i>ymt+</i>                            | Spyrou et al. 2018 <sup>8</sup>                                       |
| GEN72                                       | LNBA <i>ymt-</i>                            | <sup>9</sup> et al. 2017                                              |
| Gyvakarai1                                  | LNBA <i>ymt-</i>                            | Andrades Valtueña et al. 2017                                         |
| Post6                                       | LNBA <i>ymt-</i>                            | Andrades Valtueña et al. 2017                                         |
| 1343UnTal85                                 | LNBA <i>ymt-</i>                            | Andrades Valtueña et al. 2017                                         |
| RK1001                                      | LNBA <i>ymt-</i>                            | Andrades Valtueña et al. 2017                                         |
| Kunilall                                    | LNBA <i>ymt-</i>                            | Andrades Valtueña et al. 2017                                         |
| OOH003                                      | LNBA <i>ymt-</i>                            | Andrades Valtueña et al. 2022 <sup>7</sup>                            |
| I5884                                       | LNBA <i>ymt-</i>                            | Andrades Valtueña et al. 2022 <sup>7</sup>                            |
| VLI092                                      | LNBA <i>ymt-</i>                            | Andrades Valtueña et al. 2022 <sup>7</sup>                            |
| KNK001                                      | LNBA <i>ymt-</i>                            | Andrades Valtueña et al. 2022 <sup>7</sup>                            |
| GRS004                                      | LNBA <i>ymt-</i>                            | Andrades Valtueña et al. 2022 <sup>7</sup>                            |
| HOP001                                      | LNBA <i>ymt-</i>                            | Andrades Valtueña et al. 2022 <sup>7</sup>                            |
| HOP004                                      | LNBA <i>ymt-</i>                            | Andrades Valtueña et al. 2022 <sup>7</sup>                            |
| KLZ001                                      | LNBA <i>ymt-</i>                            | Andrades Valtueña et al. 2022 <sup>7</sup>                            |
| CHC004                                      | LNBA <i>ymt-</i>                            | Andrades Valtueña et al. 2022 <sup>7</sup>                            |
| KLE031                                      | LNBA <i>ymt-</i>                            | Andrades Valtueña et al. 2022 <sup>7</sup>                            |
| MIB054                                      | LNBA <i>ymt-</i>                            | Andrades Valtueña et al. 2022 <sup>7</sup>                            |
| KLE048                                      | LNBA <i>ymt-</i>                            | Andrades Valtueña et al. 2022 <sup>7</sup>                            |
| ARS007                                      | LNBA <i>ymt-</i>                            | Andrades Valtueña et al. 2022 <sup>7</sup>                            |
| KZL002                                      | LNBA <i>ymt-</i>                            | Andrades Valtueña et al. 2022 <sup>7</sup>                            |
| GRH001                                      | LNBA <i>ymt-</i>                            | Andrades Valtueña et al. 2022 <sup>7</sup>                            |
| VEL003                                      | LNBA <i>ymt-</i>                            | Andrades Valtueña et al. 2022 <sup>7</sup>                            |
| HGC009                                      | LNBA <i>ymt-</i>                            | Neumann et al. 2022 <sup>7</sup>                                      |
| RISE509                                     | LNBA <i>ymt-</i>                            | Rasmussen et al. 2015 <sup>10</sup>                                   |
| RISE505                                     | LNBA <i>ymt-</i>                            | Rasmussen et al. 2015 <sup>10</sup>                                   |
| C10091, Charterhouse Warren                 | LNBA <i>ymt-</i>                            | This Study                                                            |
| C10098, Charterhouse Warren                 | LNBA <i>ymt-</i>                            | This Study                                                            |
| C10928, Levens Park                         | LNBA <i>ymt-</i>                            | This Study                                                            |
| GZL002                                      | LNBA <i>ymt-</i>                            | Yu et al. 2020 <sup>11</sup>                                          |
| GZL001                                      | LNBA <i>ymt-</i>                            | Yu et al. 2020 <sup>11</sup>                                          |
| C092, <i>Yersinia Pestis</i>                | 1.ORI                                       | Parkhill et al. 2001 <sup>1</sup>                                     |
| IP32881, <i>Yersinia pseudotuberculosis</i> | Outgroup <i>Yersinia Pseudotuberculosis</i> | Reuter et al. 2014 <sup>12</sup>                                      |

**Supplementary Table 2.** Top 4 BlastN hits of the sequences in C10091 overlapping positions 2227793 and 2227794 when aligned to the CO92 (NC\_003143.1) reference sequence.

| Sequence in C10091 overlapping position 2227793 and 2227794          | Top hits | BlastN top 4 hits                    | Max Score | Total Score | Query cover | E value  | Percentage identity | Accession Length | Accession  |
|----------------------------------------------------------------------|----------|--------------------------------------|-----------|-------------|-------------|----------|---------------------|------------------|------------|
| TTAATCATCATTA***<br>ATCAACATCAACAT<br>CAACATCTTCGATC<br>TGTTGACCCAGA | 1        | <i>Yersinia pseudotuberculosis</i>   | 93.5      | 93.5        | 100%        | 2.00E-15 | 98.11%              | 4367018          | CP044064.1 |
|                                                                      | 2        | <i>Yersinia pseudotuberculosis</i>   | 93.5      | 93.5        | 100%        | 2.00E-15 | 98.11%              | 4610200          | LR134373.1 |
|                                                                      | 3        | <i>Yersinia pestis subsp. pestis</i> | 93.5      | 93.5        | 100%        | 2.00E-15 | 98.11%              | 828              | MF662143.1 |
|                                                                      | 4        | <i>Yersinia pseudotuberculosis</i>   | 93.5      | 93.5        | 100%        | 2.00E-15 | 98.11%              | 4728337          | CP009786.1 |
| TCATTAATCAACATC<br>AACATCAACATCTT<br>CGATCT                          | 1        | <i>Yersinia pseudotuberculosis</i>   | 65.8      | 65.8        | 100%        | 7.00E-08 | 100.00%             | 4367018          | CP044064.1 |
|                                                                      | 2        | <i>Yersinia pseudotuberculosis</i>   | 65.8      | 65.8        | 100%        | 7.00E-08 | 100.00%             | 4610200          | LR134373.1 |
|                                                                      | 3        | <i>Yersinia pseudotuberculosis</i>   | 65.8      | 65.8        | 100%        | 7.00E-08 | 100.00%             | 4938759          | LR134306.1 |
|                                                                      | 4        | <i>Yersinia pestis subsp. pestis</i> | 65.8      | 65.8        | 100%        | 7.00E-08 | 100.00%             | 828              | MF662143.1 |
| TCATTAATCAACATC<br>AACATCAACATCTT<br>CGATCTGTTGACC<br>CAGA           | 1        | <i>Yersinia pseudotuberculosis</i>   | 86.1      | 86.1        | 100%        | 2.00E-13 | 100.00%             | 4367018          | CP044064.1 |
|                                                                      | 2        | <i>Yersinia pseudotuberculosis</i>   | 86.1      | 86.1        | 100%        | 2.00E-13 | 100.00%             | 4610200          | LR134373.1 |
|                                                                      | 3        | <i>Yersinia pestis subsp. pestis</i> | 86.1      | 86.1        | 100%        | 2.00E-13 | 100.00%             | 828              | MF662143.1 |
|                                                                      | 4        | <i>Yersinia pseudotuberculosis</i>   | 86.1      | 86.1        | 100%        | 2.00E-13 | 100.00%             | 4728337          | CP009786.1 |
| tcattaatcaacatcaaca<br>tcaacatcttcgatctgttg                          | 1        | <i>Yersinia pseudotuberculosis</i>   | 73.1      | 73.1        | 100%        | 8.00E-10 | 100.00%             | 4367018          | CP044064.1 |
|                                                                      | 2        | <i>Yersinia pseudotuberculosis</i>   | 73.1      | 73.1        | 100%        | 8.00E-10 | 100.00%             | 4610200          | LR134373.1 |
|                                                                      | 3        | <i>Yersinia pseudotuberculosis</i>   | 73.1      | 73.1        | 100%        | 8.00E-10 | 100.00%             | 4938759          | LR134306.1 |
|                                                                      | 4        | <i>Yersinia pestis subsp. pestis</i> | 73.1      | 73.1        | 100%        | 8.00E-10 | 100.00%             | 828              | MF662143.1 |
| t*taatcaacatcaacatc<br>aacatcttcgatctgttg<br>cccaga                  | 1        | <i>Yersinia pseudotuberculosis</i>   | 80.5      | 80.5        | 100%        | 6.00E-12 | 100.00%             | 4367018          | CP044064.1 |
|                                                                      | 2        | <i>Yersinia pseudotuberculosis</i>   | 80.5      | 80.5        | 100%        | 6.00E-12 | 100.00%             | 4610200          | LR134373.1 |
|                                                                      | 3        | <i>Yersinia pestis subsp. pestis</i> | 80.5      | 80.5        | 100%        | 6.00E-12 | 100.00%             | 828              | MF662143.1 |
|                                                                      | 4        | <i>Yersinia pseudotuberculosis</i>   | 80.5      | 80.5        | 100%        | 6.00E-12 | 100.00%             | 4728337          | CP009786.1 |
| taatcaacatcaacatca<br>acatcttcgatctgttg<br>c                         | 1        | <i>Yersinia pseudotuberculosis</i>   | 71.3      | 71.3        | 100%        | 2.00E-09 | 100.00%             | 4367018          | CP044064.1 |
|                                                                      | 2        | <i>Yersinia pseudotuberculosis</i>   | 71.3      | 71.3        | 100%        | 2.00E-09 | 100.00%             | 4610200          | LR134373.1 |
|                                                                      | 3        | <i>Yersinia pseudotuberculosis</i>   | 71.3      | 71.3        | 100%        | 2.00E-09 | 100.00%             | 4938759          | LR134306.1 |
|                                                                      | 4        | <i>Yersinia pestis subsp. pestis</i> | 71.3      | 71.3        | 100%        | 2.00E-09 | 100.00%             | 828              | MF662143.1 |

**Supplementary Table 3. Radiocarbon dates of individuals included in Figure 1B.** Calibrated in OxCal 4.4<sup>13</sup> using IntCal20<sup>14</sup>. GLZ001 and GLZ002 have been corrected for a freshwater reservoir effect following Schulting et al. (2022)<sup>15</sup>; original dates are given under Source. RV2039 have been corrected for a freshwater reservoir effect following Brinker et al. (2020)<sup>16</sup>; original date given under Source. I5884 has been estimated by Andrades Valtueña et al. (2022) to be too old using BEAST v2.6.6, and has been corrected here by -200 14C years, and its error term increased to reflect uncertainty in the correction.

| Site                | Country        | Individual | Lab/sample code            | 14C yr | ±  | cal BP (95.4%) |      | Source                                                              |
|---------------------|----------------|------------|----------------------------|--------|----|----------------|------|---------------------------------------------------------------------|
| Mikhailovskiy II    | Russia         | RT5        | MAMS-29430                 | 3517   | 27 | 3873           | 3699 | Spyrou et al. 2018                                                  |
| El Sotillo          | Spain          | I2470      | Beta-299307                | 3060   | 30 | 3361           | 3176 | Andrades Valtueña et al. 2022                                       |
| Kyzyl               | Kazakhstan     | KZL002     | UBA-25474                  | 2491   | 33 | 2725           | 2430 | Andrades Valtueña et al. 2022                                       |
| Grushevskoe         | Russia         | GRH001     | MAMS-47775                 | 2707   | 20 | 2850           | 2760 | Andrades Valtueña et al. 2022                                       |
| Arbulag soum        | Mongolia       | ARS007     | NSF-Arizona                | 2991   | 48 | 3338           | 3003 | Andrades Valtueña et al. 2022                                       |
| Kytmanovo           | Russia         | RISE505    | OxA-31216                  | 3391   | 27 | 3811           | 3561 | Rasmussen et al. 2015                                               |
| Oberottmarshausen   | Germany        | OOH003     | MAMS-21543                 | 3283   | 32 | 3571           | 3410 | Andrades Valtueña et al. 2022                                       |
| Kleinaitingen       | Germany        | KLE048     | MAMS-21595                 | 3417   | 27 | 3819           | 3572 | Andrades Valtueña et al. 2022                                       |
| Mikulovice          | Czech Republic | MIB054     | MAMS-30479                 | 3550   | 19 | 3901           | 3725 | Andrades Valtueña et al. 2022                                       |
| Kleinaitingen       | Germany        | KLE031     | MAMS-21584                 | 3548   | 34 | 3965           | 3716 | Andrades Valtueña et al. 2022                                       |
| Hagios Charalambos  | Crete          | HGC009     | MAMS-45081                 | 3621   | 22 | 4061           | 3847 | Neumann et al. 2022                                                 |
| Postillionstrasse   | Germany        | Post6      | MAMS-18955                 | 3574   | 19 | 3964           | 3779 | Andrades Valtueña et al. 2017                                       |
| Chociwel            | Poland         | CHC004     | Ua-44034                   | 3645   | 33 | 4086           | 3875 | Andrades Valtueña et al. 2022                                       |
| Kaluzhnyy 1         | Russia         | KLZ001     | MAMS-45952                 | 3793   | 25 | 4246           | 4088 | Andrades Valtueña et al. 2022                                       |
| Charterhouse Warren | England        | C10098     | OxA-37840                  | 3685   | 30 | 4145           | 3910 | This Study                                                          |
| Hostivice-Palouky   | Czech Republic | HOP004     | MAMS-38921                 | 3826   | 27 | 4400           | 4096 | Andrades Valtueña et al. 2022                                       |
| Hostivice-Palouky   | Czech Republic | HOP001     | MAMS-30798                 | 3837   | 24 | 4401           | 4150 | Andrades Valtueña et al. 2022                                       |
| Kunilall            | Estonia        | Kunilall   | Poz-10825                  | 3960   | 40 | 4524           | 4256 | Andrades Valtueña et al. 2017                                       |
| Glazkovskoe         | Russia         | GLZ002     | GLZ002                     | 4077   | 68 | 4571           | 4153 | Yu et al. 2020 (4369 ± 22)                                          |
| Glazkovskoe         | Russia         | GLZ001     | GLZ001                     | 3939   | 68 | 4821           | 4420 | Yu et al. 2020 (4319 ± 22)                                          |
| Dereivka I          | Ukraine        | I5884      | PSUAMS-282,<br>PSUAMS-7830 | 3989   | 60 | 4790           | 4244 | Andrades Valtueña et al. 2022;<br>Patterson et al. 2022 (4189 ± 17) |
| Velešovice          | Czech Republic | VEL003     | MAMS-34184                 | 3951   | 26 | 4518           | 4294 | Andrades Valtueña et al. 2022                                       |
| Großstorkwitz       | Germany        | GRS004     | Hd-21977                   | 4039   | 17 | 4571           | 4425 | Andrades Valtueña et al. 2022                                       |
| Gyvakarai           | Lithuania      | Gyvakarai1 | Poz-61584                  | 4030   | 30 | 4574           | 4418 | Andrades Valtueña et al. 2017                                       |
| Krasnogvardeyskoe   | Russia         | KNK001     | MAMS-45959                 | 4158   | 26 | 4827           | 4580 | Andrades Valtueña et al. 2022                                       |
| Vlinceves           | Czech Republic | VLI092     | MAMS-45801                 | 4176   | 26 | 4834           | 4585 | Andrades Valtueña et al. 2022                                       |
| Bateni, Afanasievo  | Russia         | RISE509    | OxA-31221                  | 4186   | 27 | 4838           | 4617 | Rasmussen et al. 2015                                               |
| Riņņukalns          | Latvia         | RV2039     | KIA-46462                  | 4519   | 57 | 5432           | 4973 | Susat et al 2021; Brinker et al. 2020 (5049 ± 33)                   |

## Supplementary References

1. Parkhill, J. *et al.* Genome sequence of *Yersinia pestis*, the causative agent of plague. *Nature* **413**, 523–527 (2001).
2. Neukamm, J., Peltzer, A. & Nieselt, K. DamageProfiler: Fast damage pattern calculation for ancient DNA. *Bioinformatics* (2021) doi:10.1093/bioinformatics/btab190.
3. Li, H. & Durbin, R. Fast and accurate short read alignment with Burrows-Wheeler transform. *Bioinformatics* **25**, 1754–1760 (2009).
4. Rascovan, N. *et al.* Emergence and Spread of Basal Lineages of *Yersinia pestis* during the Neolithic Decline. *Cell* **176**, 295–305.e10 (2019).
5. Skoglund, P. *et al.* Genomic diversity and admixture differs for Stone-Age Scandinavian foragers and farmers. *Science* **344**, 747–750 (2014).
6. Susat, J. *et al.* A 5,000-year-old hunter-gatherer already plagued by *Yersinia pestis*. *Cell Rep.* **35**, 109278 (2021).
7. Andrades Valtueña, A. *et al.* Stone Age *Yersinia pestis* genomes shed light on the early evolution, diversity, and ecology of plague. *Proc. Natl. Acad. Sci. U. S. A.* **119**, e2116722119 (2022).
8. Spyrou, M. A. *et al.* Analysis of 3800-year-old *Yersinia pestis* genomes suggests Bronze Age origin for bubonic plague. *Nat. Commun.* **9**, 2234 (2018).
9. Andrades Valtueña, A. *et al.* The Stone Age Plague and Its Persistence in Eurasia. *Curr. Biol.* **27**, 3683–3691.e8 (2017).
10. Rasmussen, S. *et al.* Early divergent strains of *Yersinia pestis* in Eurasia 5,000 years ago. *Cell* **163**, 571–582 (2015).
11. Yu, H. *et al.* Paleolithic to Bronze Age Siberians Reveal Connections with First Americans and across Eurasia. *Cell* **181**, 1232–1245.e20 (2020).
12. Reuter, S. *et al.* Parallel independent evolution of pathogenicity within the genus *Yersinia*. *Proc. Natl. Acad. Sci. U. S. A.* **111**, 6768–6773 (2014).
13. Bronk Ramsey, C. Development of the Radiocarbon Calibration Program. *Radiocarbon* **43**, 355–363 (2001).
14. Reimer, P. J. *et al.* The IntCal20 Northern Hemisphere Radiocarbon Age Calibration Curve (0–55 cal kBP). *Radiocarbon* **62**, 725–757 (2020).
15. Schulting, R. J. *et al.* Freshwater reservoir effects in Cis-Baikal: An overview. *Archaeological Research in Asia* **29**, 100324 (2022).
16. Brinker, U. *et al.* Two burials in a unique freshwater shell midden: insights into transformations of Stone Age hunter-fisher daily life in Latvia. *Archaeol. Anthropol. Sci.* **12**, 97 (2020).
